# Supplementary material for: A crucial role for the CeO2–ZrO2 support for the low temperature water gas shift reaction over Cu–CeO2–ZrO2 catalysts
Source: Royal Society of Chemistry journal article supplement (doi:10.1039/c5cy00499c), 2015-01-01
Supplement: c5cy00499c1.pdf [file c5cy00499c1.pdf]

Electronic Supplementary Information (ESI)

**A crucial role of CeO<sub>2</sub>–ZrO<sub>2</sub> support for the low temperature water gas shift  
reaction over Cu–CeO<sub>2</sub>–ZrO<sub>2</sub> catalysts**

Dae-Woon Jeong, Hyun-Suk Na, Jae-Oh Shim, Won-Jun Jang, and Hyun-Seog Roh\*

*Department of Environmental Engineering, Yonsei University, 1 Yonseidae-gil, Wonju, Gangwon 220-710,*

*S. Korea*

**Table S1**

H<sub>2</sub> consumption of the Cu–CeO<sub>2</sub>, Cu–ZrO<sub>2</sub>, and Cu–CeO<sub>2</sub>–ZrO<sub>2</sub> catalysts

| Catalyst                                              | H <sub>2</sub> -consumption (mmol/g) |
|-------------------------------------------------------|--------------------------------------|
| Cu–CeO <sub>2</sub>                                   | 4.22                                 |
| Cu–Ce <sub>0.8</sub> Zr <sub>0.2</sub> O <sub>2</sub> | 4.33                                 |
| Cu–Ce <sub>0.6</sub> Zr <sub>0.4</sub> O <sub>2</sub> | 3.50                                 |
| Cu–Ce <sub>0.4</sub> Zr <sub>0.6</sub> O <sub>2</sub> | 3.20                                 |
| Cu–Ce <sub>0.2</sub> Zr <sub>0.8</sub> O <sub>2</sub> | 2.81                                 |
| Cu–ZrO <sub>2</sub>                                   | 2.55                                 |
| Theoretical value <sup>a</sup>                        | 2.50                                 |

<sup>a</sup> Attributed to the reduction of CuO alone
